# Supplementary material for: Anthropogenic land use estimates for the Holocene – HYDE 3.2
Source: Copernicus journal article supplement (doi:10.5194/essd-9-927-2017), 2017-12-01
Supplement: Supplementary file 1 [file essd-9-927-2017-supplement.zip]

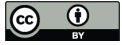

## *Supplement of*

# **Anthropogenic land use estimates for the Holocene – HYDE 3.2**

**K. Klein Goldewijk et al.**

*Correspondence to:* Kees Klein Goldewijk ([c.g.m.kleingoldewijk@uu.nl](mailto:c.g.m.kleingoldewijk@uu.nl))

- [essd-9-927-2017-supplement-title-page.pdf](#)
- [Supplement A.DOCX](#)
- [Supplement B.DOCX](#)
- [Supplement C.DOCX](#)
- [Supplement D.DOCX](#)

The copyright of individual parts of the supplement might differ from the CC BY 3.0 License.
